# Supplementary material
Source: Springer Nature journal article supplement (https://www.springermedizin.de/resource/supplementary/12889_2007_1102_MOESM3_ESM.pdf/9502456)

Overall

Non-target groups

Target groups for HB vaccine

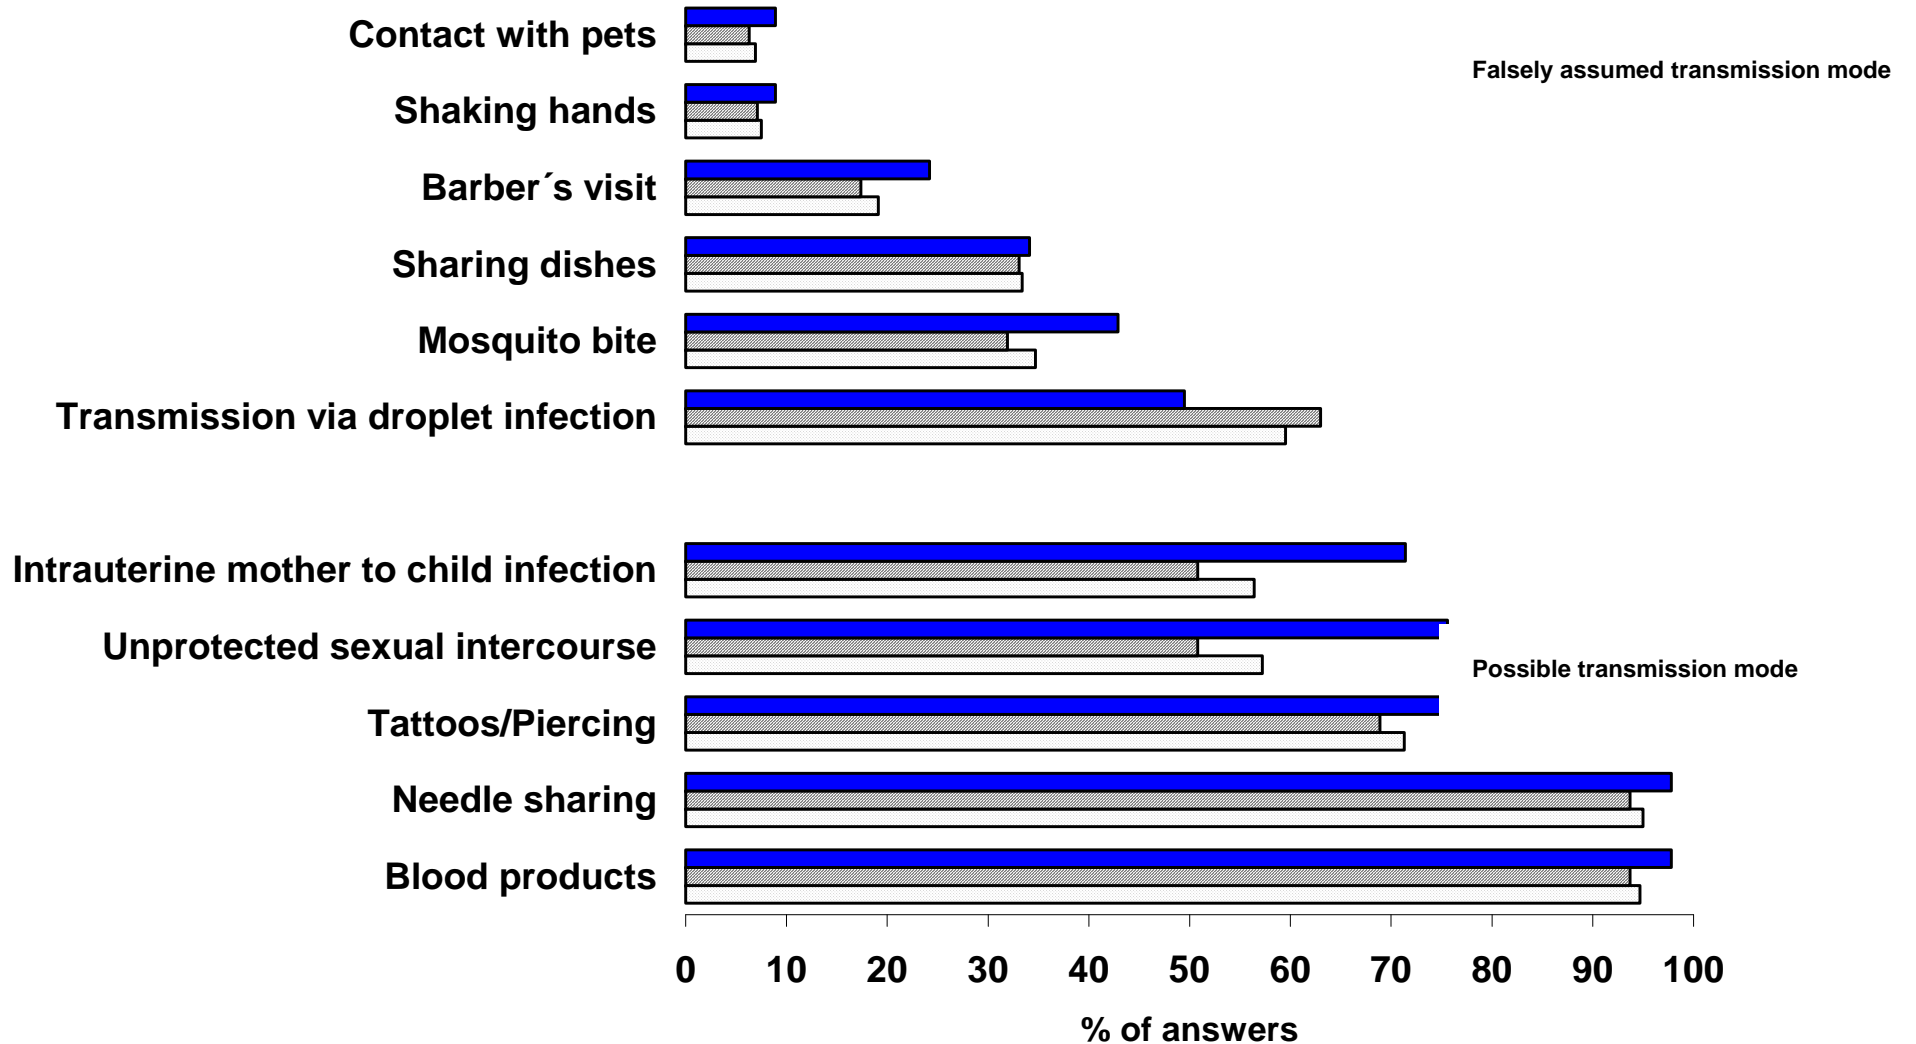

Supplement: MOESM3 [file 9502456]
